# Supplementary material
Source: PubMed Central journal article supplement (PMC4284564)
Supplement: pnas.201422488SI.pdf [file pnas.201422488SI.pdf]

# Supporting Information

Ciccia et al. 10.1073/pnas.1422488112

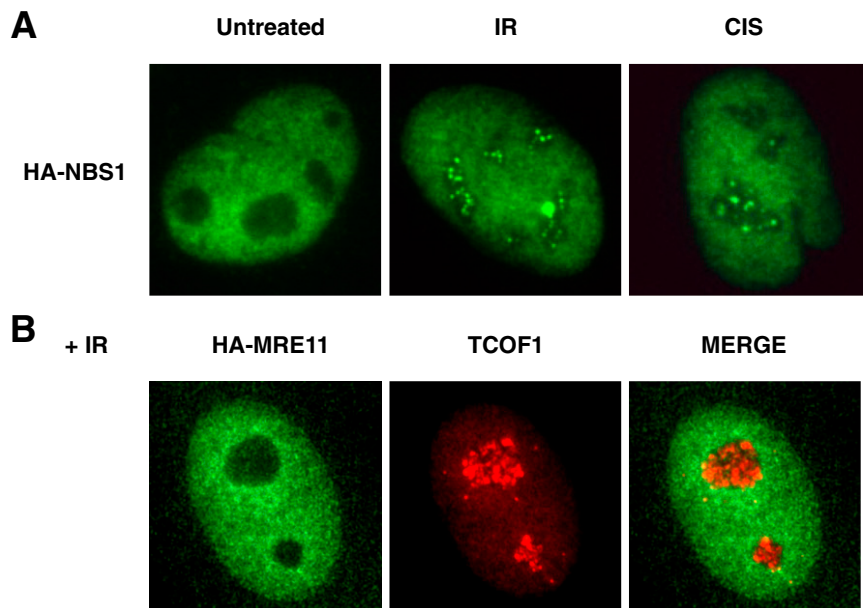

**Fig. S1.** Localization of HA-tagged NBS1 and MRE11 after DNA damage. (A) Representative pictures of U2OS cells expressing HA-NBS1 treated with IR (10 Gy) or cisplatin (1  $\mu$ M) and stained with antibodies against the HA tag. (B) Representative pictures of U2OS cells expressing HA-MRE11 treated with IR (10 Gy) and stained with antibodies against the HA tag (green) and TCOF1 (red).

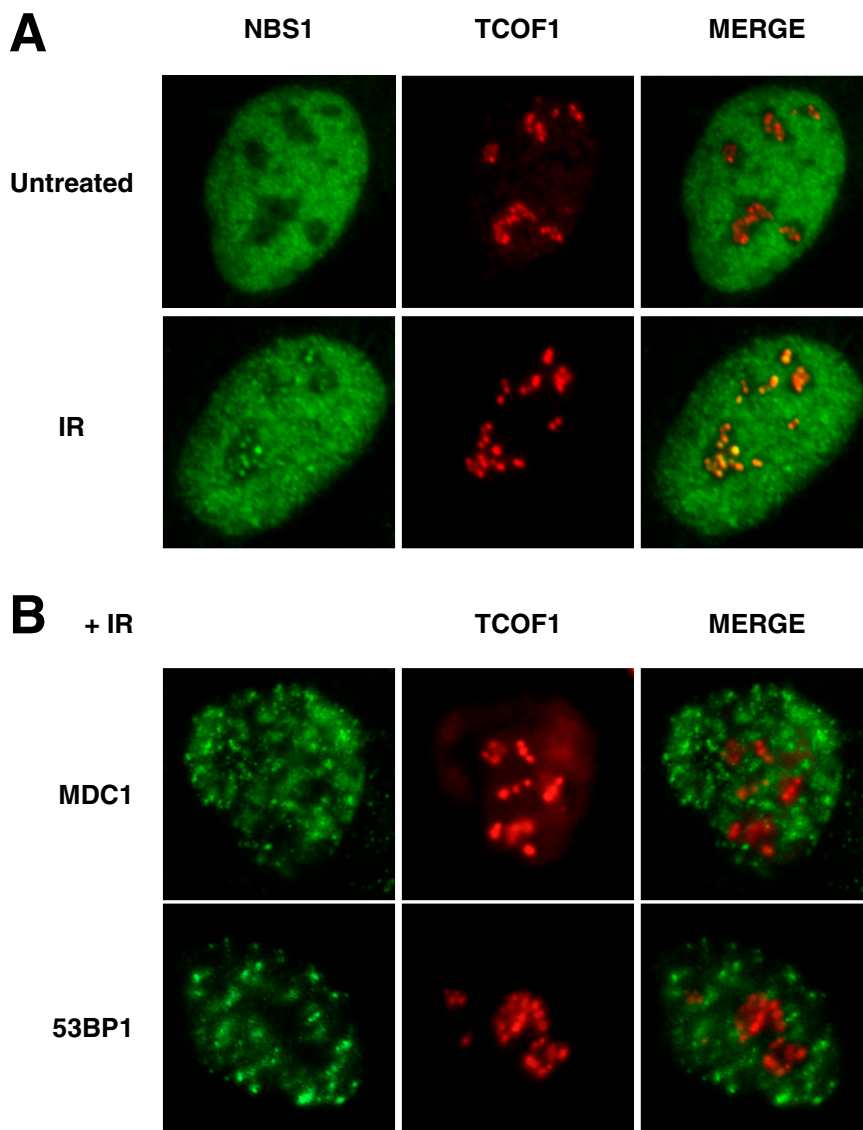

**Fig. S2.** Localization of endogenous NBS1, MDC1, 53BP1, and TCOF1 after ionizing radiation. (A) Representative pictures of U2OS cells with or without IR treatment (10 Gy) stained with antibodies against NBS1 (green) and TCOF1 (red). (B) Representative pictures of U2OS cells with IR treatment (10 Gy) stained with antibodies against MDC1 or 53BP1 (green) and TCOF1 (red).

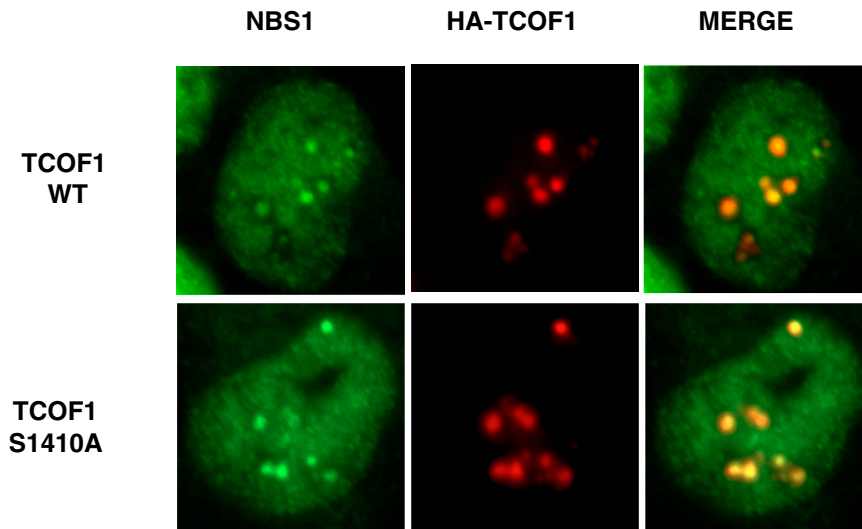

**Fig. S3.** Localization of NBS1 to nucleoli after expression of TCOF1 S1410A mutant. Representative pictures of U2OS cells expressing TCOF1 wild-type or S1410A mutant after IR treatment (10 Gy) stained with antibodies against NBS1 (green) and the HA tag (red).

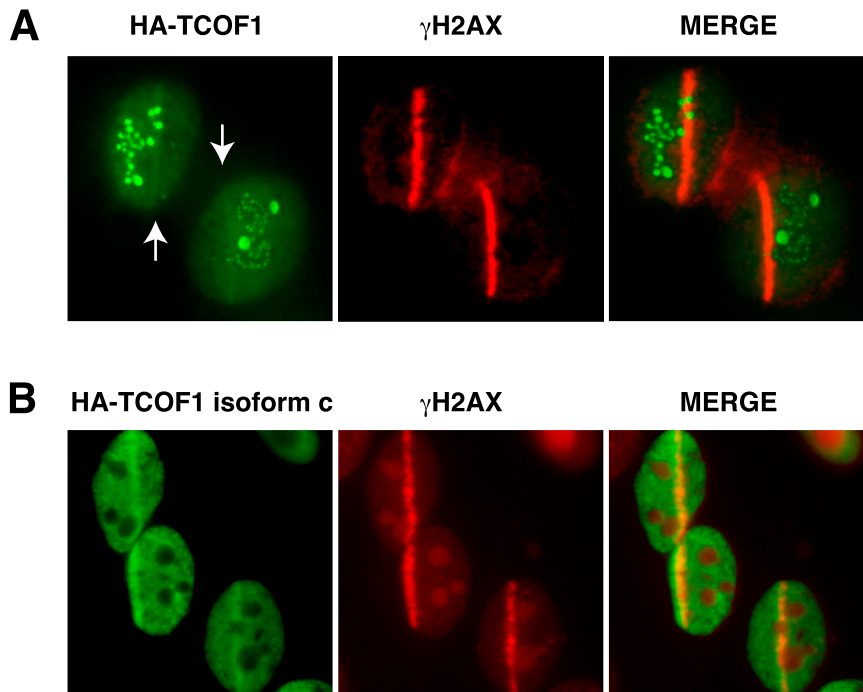

**Fig. S4.** Localization of TCOF1 after UV laser microirradiation. (A) Representative pictures of U2OS cells expressing HA-TCOF1 after UV laser microirradiation stained with antibodies against the HA tag (green) and  $\gamma$ H2AX (red). (B) Representative pictures of U2OS cells expressing HA-TCOF1 isoform c after UV laser microirradiation stained as in A.
